# Supplementary material for: Porous polymer oil sorbents based on PET fibers with crosslinked copolymer coatings
Source: Royal Society of Chemistry journal article supplement (doi:10.1039/c3ra44759f), 2013-01-01
Supplement: c3ra44759f.pdf [file c3ra44759f.pdf]

## Supporting Information

### for Porous Polymer Oil Sorbents Based on PET Fibers with Crosslinked Copolymer Coatings

Ayman M. Atta, Witold Brostow,\* Haley E. Hagg Lobland, Abdul-Raheim M. Hasan, Jose M. Perez

#### Experimental Techniques

**Electron Microscopy.** Images of the polymer specimens were obtained with a JEOL JSM-5800 model electron microscope. Dried crosslinked polymers and treated NWPET fibers were cut to expose their inner structure and coated with a thin layer of Pd + Au alloy before SEM characterization. Environmental scanning electron microscope (ESEM) was also used to study the morphologies of the prepared crosslinked copolymers. Micrographs of the samples were detected using a FEI Quanta ESEM. A small fraction of the samples were cut or fractured in liquid nitrogen and mounted on standard SEM pin sub mount.

**Dynamic Mechanical Analysis.** Testing was carried out on samples with rectangular shape having the dimensions of 5x5x10 mm. Tests were conducted in the compression configuration on a Perkin Elmer model DMA 8000, from -30°C to 100°C at heating rate of 5°C/min with a 1 Hz sinusoidal frequency.

**Differential Scanning Calorimetry.** The samples were heated from 0°C to 100 °C in N<sub>2</sub> flow (20 cm/min) at a heating rate of 10°C/min. The instrument used was a Perkin Elmer TGA 7.

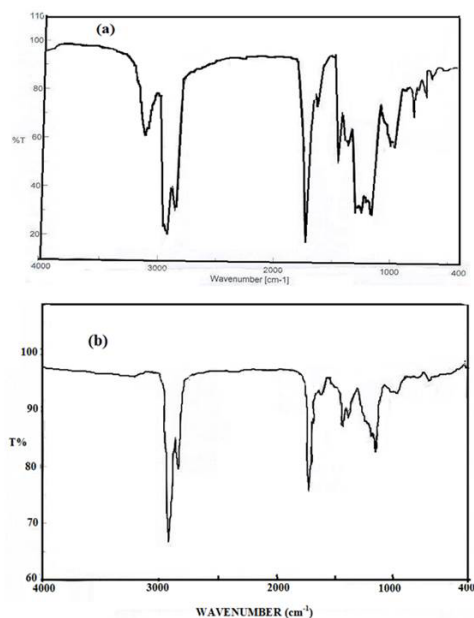

**Figure S1.** FTIR spectra of (a) DLM monomer and (b) crosslinked (with 1 wt. % DVB) ODA homopolymer.

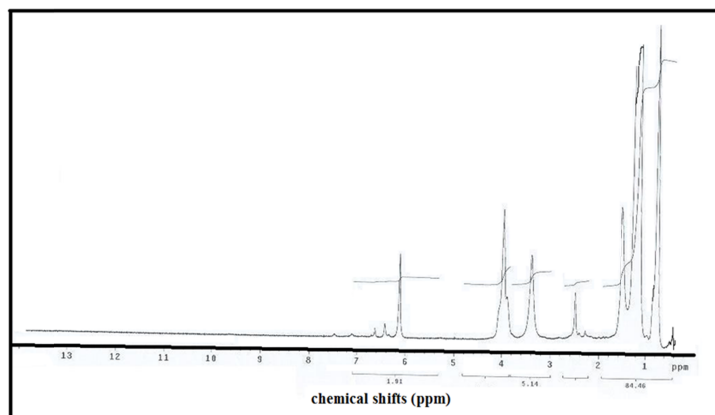

**Figure S2.**  $^1\text{H}$ NMR spectrum of DOM monomer. Chemical shifts  $\delta$  of the peaks: 0.765 ppm (t, 6H,  $\text{CH}_3$ ), 1.166 ppm (m, 20H,  $\text{CH}_2$ ), 1.506 ppm (m, 4H,  $\text{CH}_2$ ), 3.972 ppm (t, 4H,  $\text{CH}_2$ ), 6.129 ppm (d, 2H, CH).

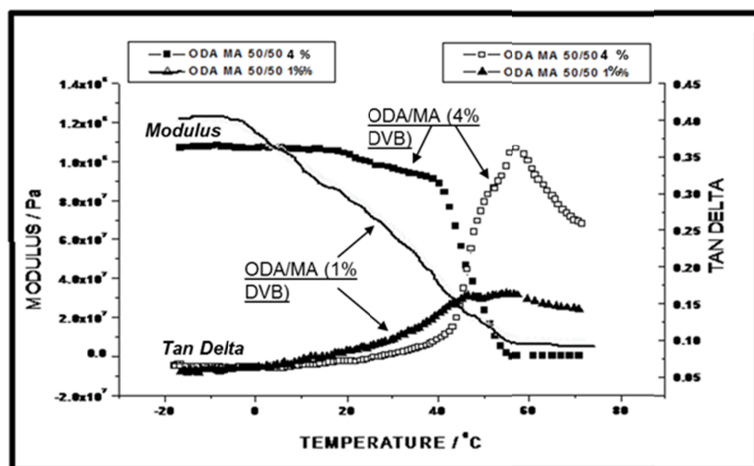

**Figure S3.** DMA data of crosslinked ODA/MA prepared by bulk polymerization. Percentages (1% and 4%) refer to concentration of the crosslinker DVB.

**Table S1.** DSC data of crosslinked homopolymers and copolymers as coatings on NWPET.

| Polymers | DVB wt. % | $T_g / ^\circ\text{C}$ |      | $T_m / ^\circ\text{C}$ |      | $T_c / ^\circ\text{C}$ |      |
|----------|-----------|------------------------|------|------------------------|------|------------------------|------|
|          |           | Cyclohexane            | Bulk | Cyclohexane            | Bulk | Cyclohexane            | Bulk |
| ODA      | 1         | 31 <sup>a</sup>        | 34   | 45 <sup>a</sup>        | 52   | 34 <sup>a</sup>        | 28   |
|          | 4         | 33 <sup>a</sup>        | 36   | 47 <sup>a</sup>        | 54   | 38 <sup>a</sup>        | 25   |
| DOM      | 1         | 25                     | 32   | -                      | -    | -                      | -    |
|          | 4         | 23                     | 28   | -                      | -    | -                      | -    |
| DLM      | 1         | 35                     | 38   | 45                     | 46   | 34                     | 23   |
|          | 4         | 38                     | 40   | 47                     | 50   | 35                     | 33   |
| ODA/MA   | 1         | -                      | -    | 34                     | 37   | 19                     | 16   |
|          | 4         | -                      | 29   | 38                     | 44   | 22                     | 15   |
| ODA/DOM  | 1         | -                      | -    | 45                     | 47   | 22                     | 23   |
|          | 4         | -                      | -    | 48                     | 49   | 25                     | 27   |
| ODA/DLM  | 1         | 38                     | 32   | 39                     | 42   | 20                     | 22   |
|          | 4         | 31                     | 34   | 41                     | 44   | 23                     | 25   |

a) Polymerization completed in isopropanol rather than cyclohexane solvent.
